# Supplementary material
Source: PubMed Central journal article supplement (PMC1194910)

## SPEED TESTS

### Movement frequency

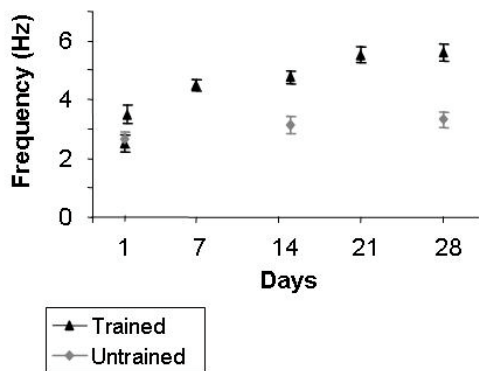

### Errors

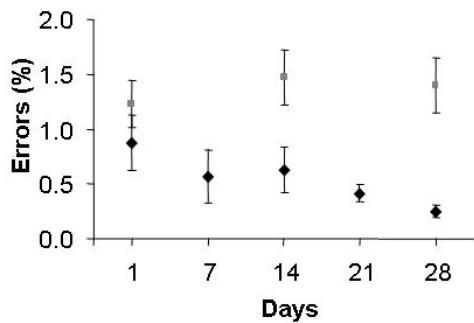

## fMRI TASKS

### Reaction time

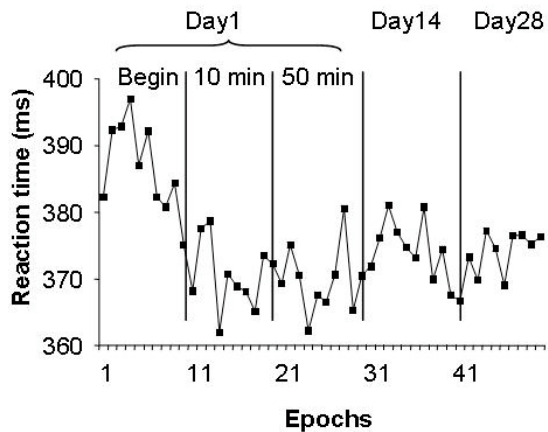

### Errors

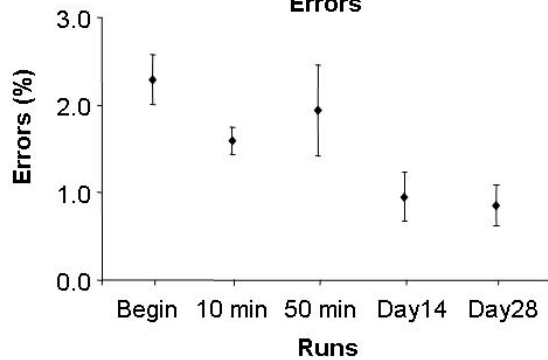

Supplement: pnas_0502762102_1.pdf [file pnas_0502762102_1.pdf]

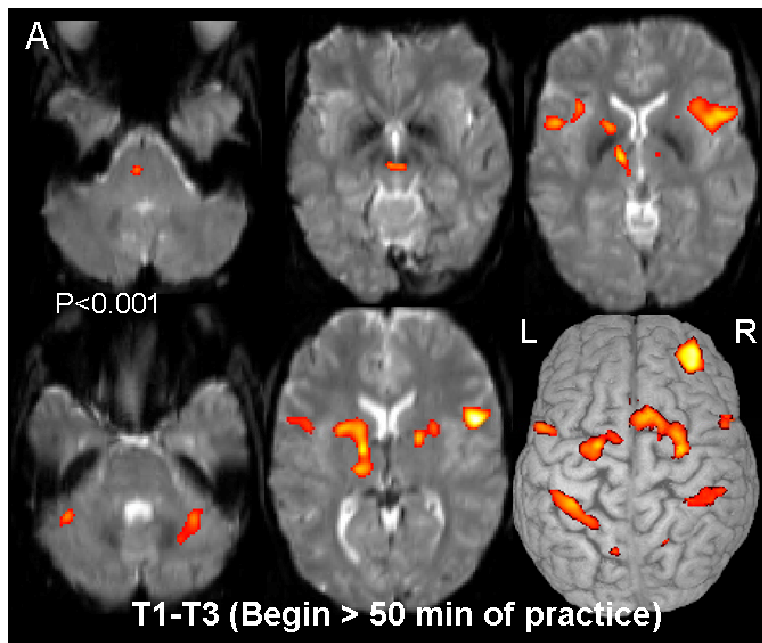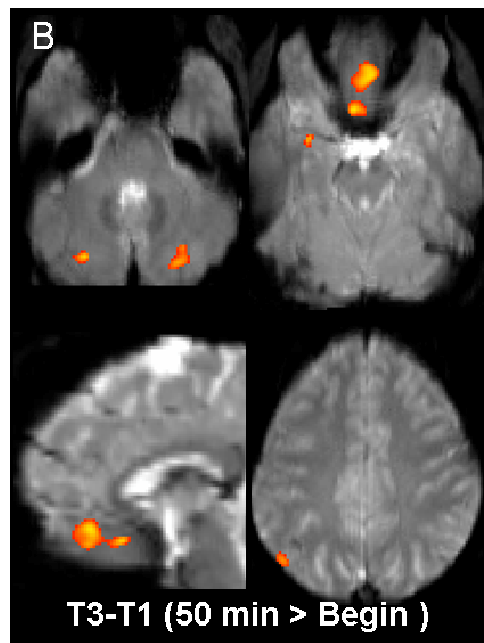

Supplement: pnas_0502762102_2.pdf [file pnas_0502762102_2.pdf]
